# Supplementary material
Source: Springer Nature journal article supplement (https://www.springermedizin.de/resource/supplementary/12891_2010_802_MOESM2_ESM.pdf/9507054)
Supplement: MOESM2 [file 9507054]

Recruitment  
n=146

Enrolment

Randomisation

ASMP

OAKP

Baseline  
assessment

Baseline  
assessment

**ASMP**  
(6weeks)

**OAKP**  
(6weeks)

Week8  
assessment

Week8  
assessment

6month  
assessment

6month  
assessment

12month  
assessment

12month  
assessment
